# Supplementary material for: Fine-Scale Recombination Maps of Fungal Plant Pathogens Reveal Dynamic Recombination Landscapes and Intragenic Hotspots
Source: PubMed Central journal article supplement (PMC5844332; doi:10.1534/genetics.117.300502), 2017-12-20

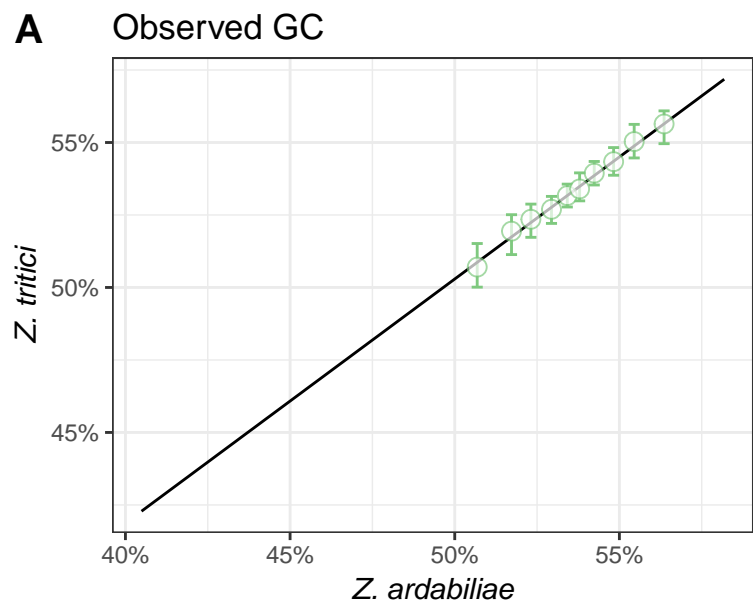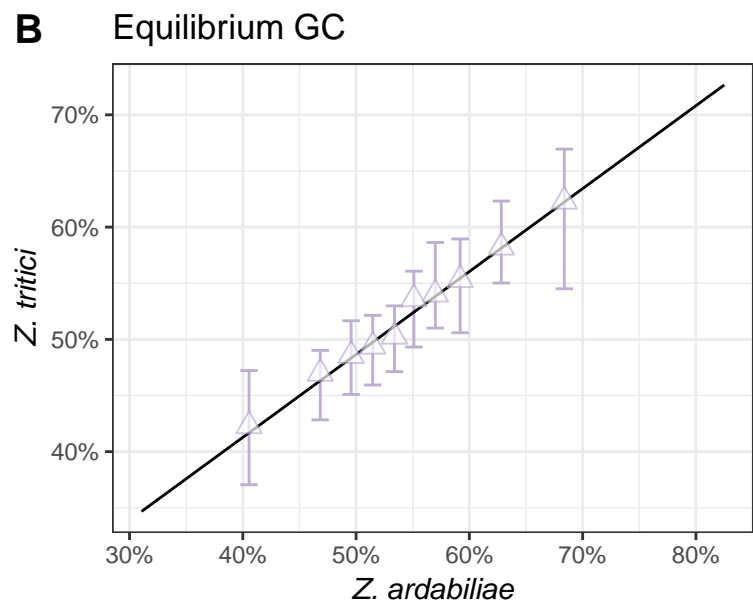

**C**

Type ○ GCobs △ GCeq

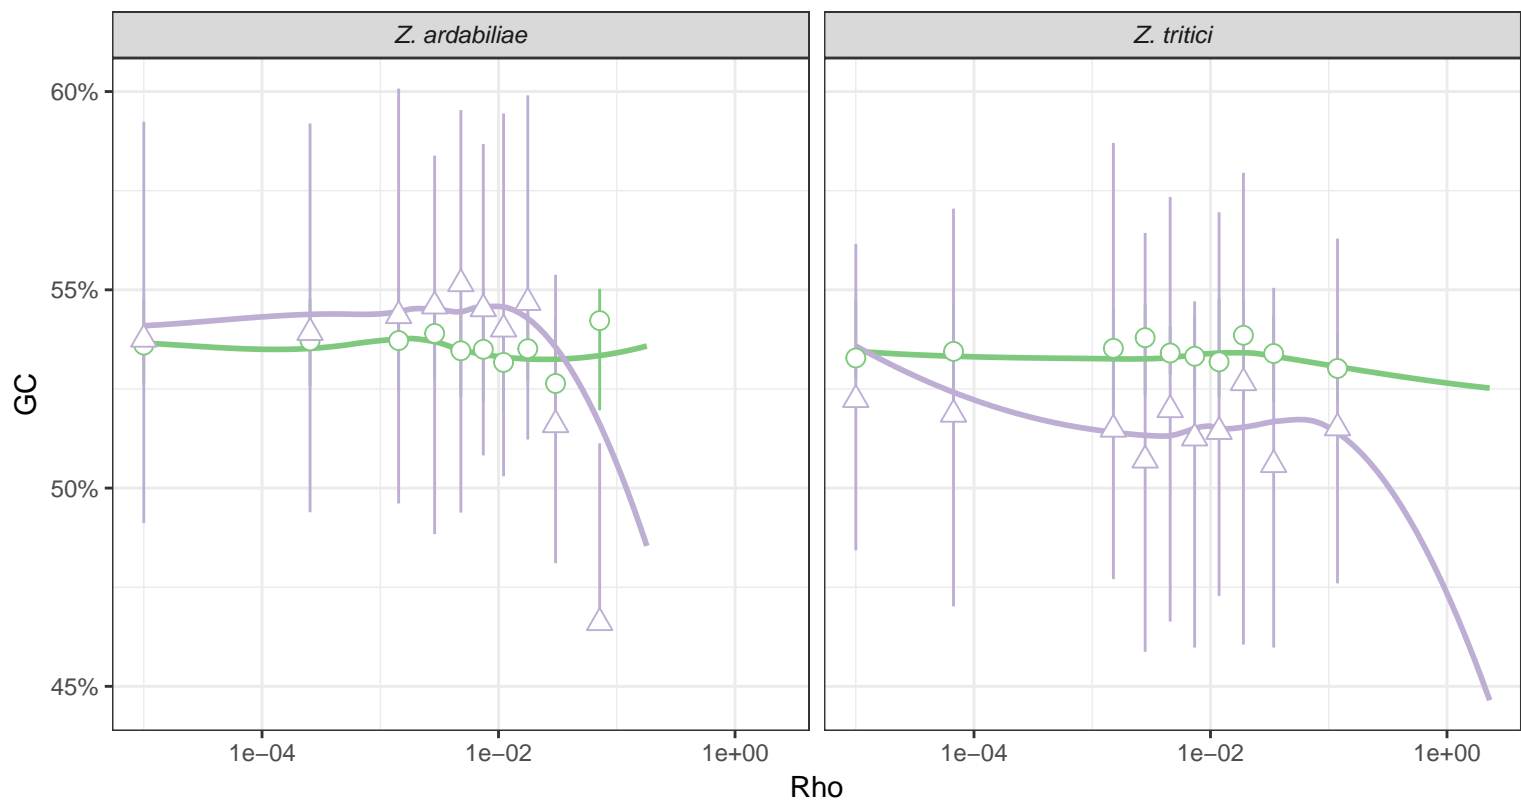

Supplement: 1209FigureS3.pdf [file 1209FigureS3.pdf]
